# Supplementary material for: Nutraceutical COMP-4 confers protection against endothelial dysfunction through the eNOS/iNOS-NO-cGMP pathway
Source: PubMed Central journal article supplement (PMC11801596; doi:10.1371/journal.pone.0316798), 2025-02-06

iNOS

|              |         | Area  | Mean    | Min | Max | adjusted |
|--------------|---------|-------|---------|-----|-----|----------|
| <b>iNOS</b>  | blank   | 0.003 | 30      | 30  | 30  |          |
|              | control | 0.003 | 107.932 | 60  | 176 | 77.932   |
|              | IBMX    | 0.003 | 89.823  | 60  | 147 | 59.823   |
|              | control | 0.003 | 96.295  | 60  | 156 | 66.295   |
|              | C4      | 0.003 | 139.885 | 61  | 215 | 109.885  |
|              | C4      | 0.003 | 153.386 | 63  | 232 | 123.386  |
|              | L-Arg   | 0.003 | 108.212 | 61  | 153 | 78.212   |
| <b>GAPDH</b> | blank   |       |         |     |     |          |
|              | control | 0.008 | 141.507 | 43  | 255 | 39.468   |
|              | IBMX    | 0.008 | 158.161 | 62  | 255 | 56.122   |
|              | control | 0.008 | 153.897 | 61  | 255 | 51.858   |
|              | C4      | 0.008 | 144.988 | 59  | 255 | 42.949   |
|              | C4      | 0.008 | 154.436 | 61  | 255 | 52.397   |
|              | L-Arg   | 0.008 | 137.095 | 55  | 255 | 35.056   |

30 ug protein loaded  
 iNOS 1:500  
 GEL Mini protean protean Gel 4-20%  
 Licor photo documentation  
 1st membrane

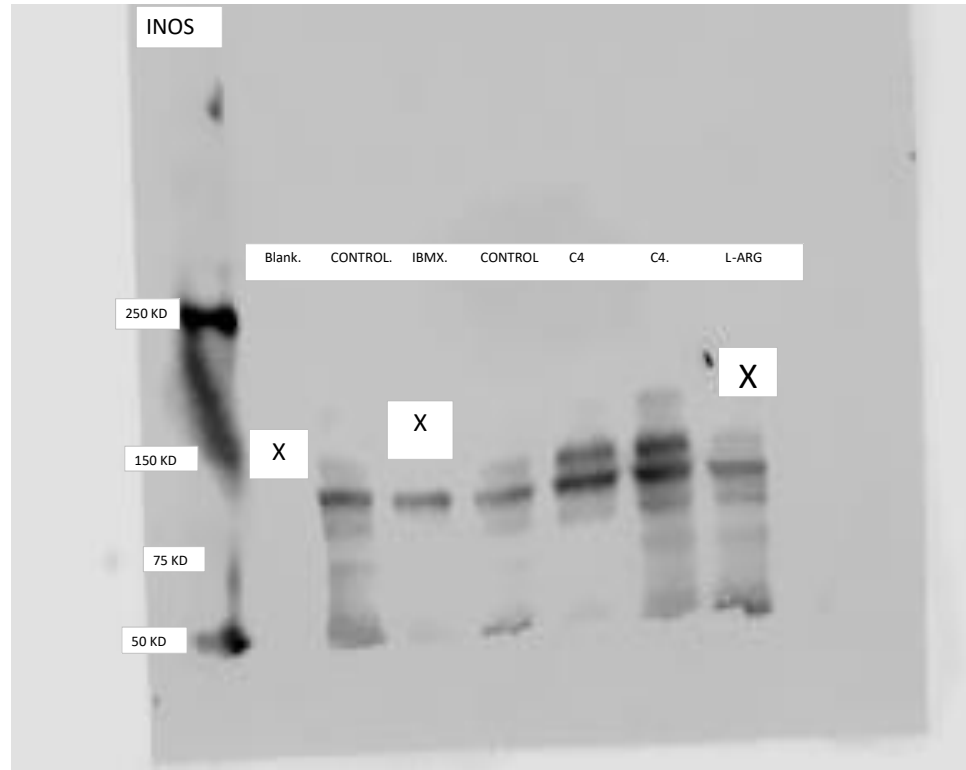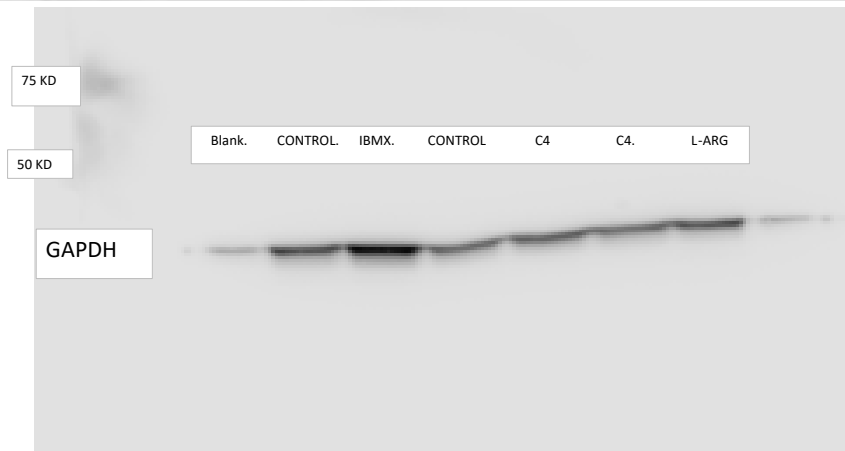

Supplement: pone.0316798.s002.pdf [file pone.0316798.s002.pdf]
