# Supplementary material for: Nutraceutical COMP-4 confers protection against endothelial dysfunction through the eNOS/iNOS-NO-cGMP pathway
Source: PubMed Central journal article supplement (PMC11801596; doi:10.1371/journal.pone.0316798), 2025-02-06

|              |         | Area   | Mean    | Min | Max    | adjusted |
|--------------|---------|--------|---------|-----|--------|----------|
| <b>eNOS</b>  | blank   | 0.005  | 30      | 30  | 30     |          |
|              | control | 0.005  | 46.967  | 30  | 100    | 46.967   |
|              | IBMX    | 0.005  | 30.963  | 30  | 42     | 30.963   |
|              | control | 0.005  | 57.046  | 30  | 119    | 57.046   |
|              | C4      | 0.005  | 124.68  | 34  | 255    | 124.680  |
|              | C4      | 0.005  | 126.824 | 34  | 255    | 126.824  |
| L-Arg        | 0.005   | 47.447 | 30      | 94  | 47.447 |          |
| <b>GAPDH</b> | blank   | 0.005  | 30      | 30  | 30     |          |
|              | control | 0.005  | 89.695  | 36  | 189    | 59.695   |
|              | IBMX    | 0.005  | 120.134 | 42  | 255    | 90.134   |
|              | control | 0.005  | 77.128  | 33  | 161    | 47.128   |
|              | C4      | 0.005  | 82.046  | 35  | 161    | 52.046   |
|              | C4      | 0.005  | 81.305  | 37  | 156    | 51.305   |
|              | L-Arg   | 0.005  | 82.78   | 34  | 186    | 52.780   |

30 ug protein loaded  
eNOS 1:500  
GEL Mini protean protean Gel 4-20%  
Lycor photo documentation  
1st membrane

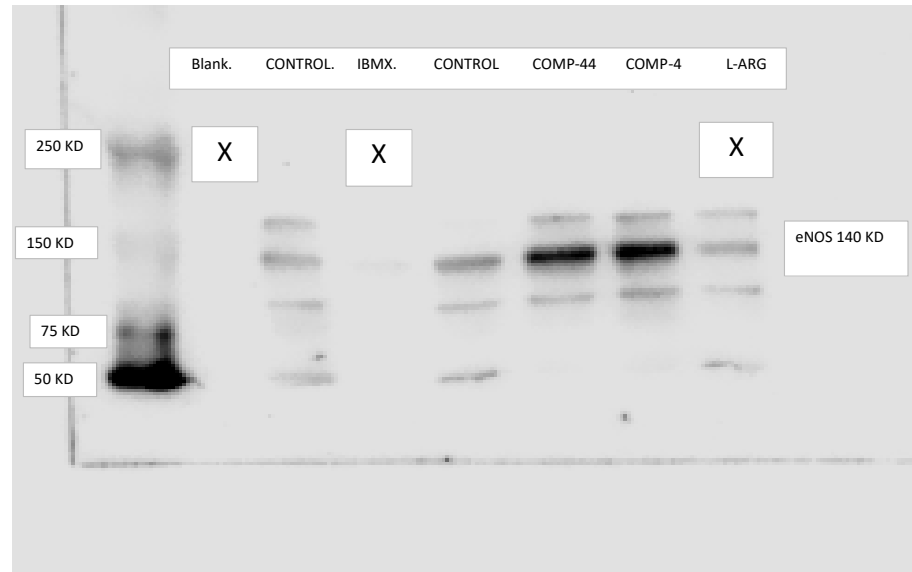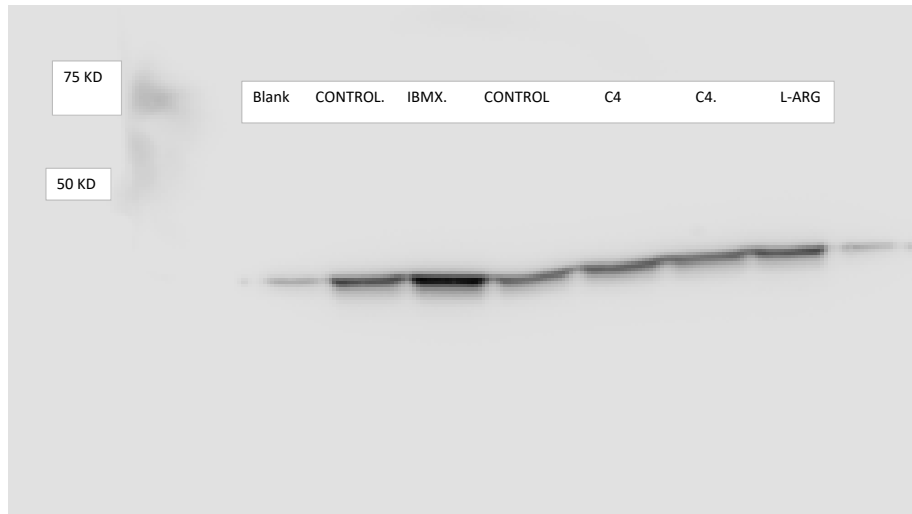

Supplement: pone.0316798.s003.pdf [file pone.0316798.s003.pdf]
