# Supplementary material for: Nutraceutical COMP-4 confers protection against endothelial dysfunction through the eNOS/iNOS-NO-cGMP pathway
Source: PubMed Central journal article supplement (PMC11801596; doi:10.1371/journal.pone.0316798), 2025-02-06
Supplement: pone.0316798.s004.pdf [file pone.0316798.s004.pdf]

| Total Protein                                    |                  |               |                           |
|--------------------------------------------------|------------------|---------------|---------------------------|
| Lane                                             | Sample treatment | 700 nm signal | Lane Normalization Factor |
| gel-1<br>protein<br>12/10/21                     | 1 Control        | 181           | 0.850                     |
|                                                  | 2 H2O2           | 153           | 0.718                     |
|                                                  | 3 C4             | 176           | 0.826                     |
|                                                  | 4 C4+H2O2        | 208           | 0.977                     |
|                                                  | 5 MP             | 213           | 1.000                     |
| gel-2<br>medium<br>12/10/21<br>-----<br>10/28/21 | 6 Control        | 65.7          | 0.877                     |
|                                                  | 7 H2O2           | 69.6          | 0.929                     |
|                                                  | 8 C4             | 68            | 0.908                     |
|                                                  | 9 C4+H2O2        | 70.5          | 0.941                     |
|                                                  | 10 MP            | 74.9          | 1.000                     |
|                                                  | 11 Control       | 146           | 0.942                     |
|                                                  | 12 PC            | 114           | 0.735                     |
|                                                  | 13 MP            | 150           | 0.968                     |
|                                                  | 14 Citr          | 155           | 1.000                     |

| PAI (45 kDa)                                     |                  |               |              |                             |
|--------------------------------------------------|------------------|---------------|--------------|-----------------------------|
| Lane                                             | Sample treatment | target signal | LNF (Revert) | Normalized to total protein |
| gel-1<br>protein<br>12/10/21                     | 1 Control        | 20.0          | 0.850        | 23.5                        |
|                                                  | 2 H2O2           | 23.3          | 0.718        | 32.4                        |
|                                                  | 3 C4             | 17.7          | 0.826        | 21.4                        |
|                                                  | 4 C4+H2O2        | 20.4          | 0.977        | 20.9                        |
|                                                  | 5 MP             | 19.2          | 1.000        | 19.2                        |
| gel-2<br>medium<br>12/10/21<br>-----<br>10/28/21 | 6 Control        | 27.2          | 0.877        | 31.0                        |
|                                                  | 7 H2O2           | 27.2          | 0.929        | 29.3                        |
|                                                  | 8 C4             | 23.9          | 0.908        | 26.3                        |
|                                                  | 9 C4+H2O2        | 26.6          | 0.941        | 28.3                        |
|                                                  | 10 MP            | 23.8          | 1.000        | 23.8                        |
|                                                  | 11 Control       | 17.8          | 0.942        | 18.9                        |
|                                                  | 12 PC            | 16.5          | 0.735        | 22.4                        |
|                                                  | 13 MP            | 18.2          | 0.968        | 18.8                        |
|                                                  | 14 Citr          | 17.1          | 1.000        | 17.1                        |

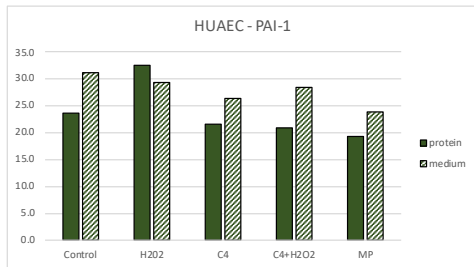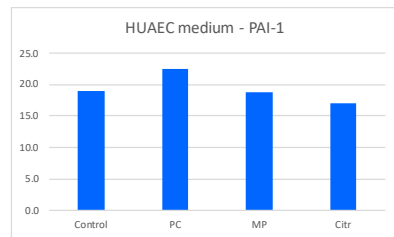

gel-1

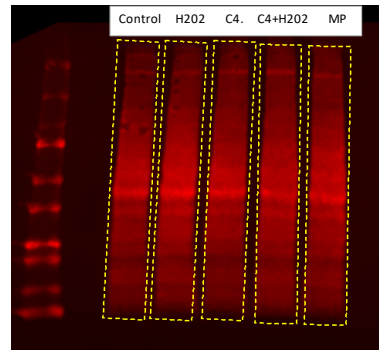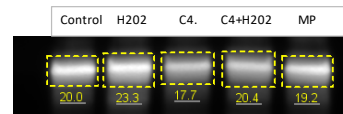

Fig 7

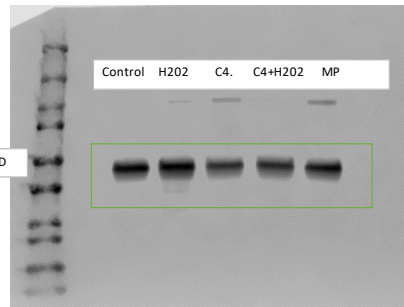

Gel 4-20%  
Lycor photodocumentation  
700 nm Signal

gel-2

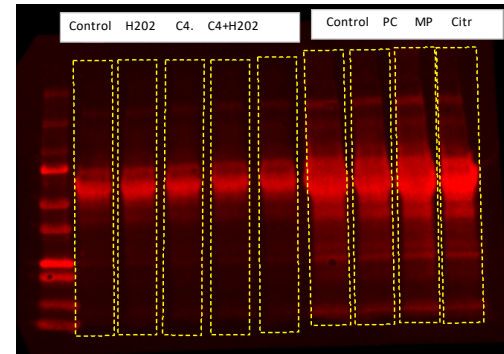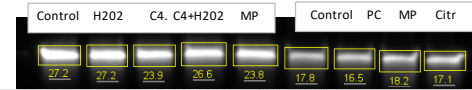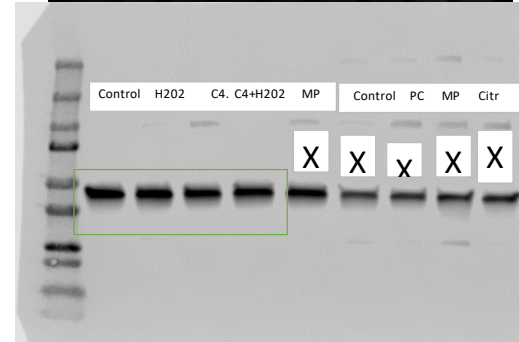

Fig 7
