# Supplementary material for: Nutraceutical COMP-4 confers protection against endothelial dysfunction through the eNOS/iNOS-NO-cGMP pathway
Source: PubMed Central journal article supplement (PMC11801596; doi:10.1371/journal.pone.0316798), 2025-02-06
Supplement: pone.0316798.s005.pdf [file pone.0316798.s005.pdf]

|  | Group A | Group B    | Group C | Group D | Group E | Group F | Group G         | Group H       |
|----------------------------------------------------------------------------------|---------|------------|---------|---------|---------|---------|-----------------|---------------|
|                                                                                  | Control | Sildenafil | IBMX    | L-NAME  | LNIL    | COMP-4  | COMP-4 + L-NAME | COMP-4 +L-NIL |
|                                                                                  |         |            |         |         |         |         |                 |               |
| 1                                                                                | 11.82   | 75.6200    | 22.89   | 7.34    | 17.00   | 33.590  | 7.8600000       |               |
| 2                                                                                | 18.13   | 37.5600    | 50.90   | 7.33    | 12.00   | 23.020  | 11.4300000      |               |
| 3                                                                                | 9.38    | 37.4100    | 51.38   | 7.58    | 17.30   | 38.440  | 14.2067746      | 15.162        |
| 4                                                                                | 18.30   | 58.6000    | 25.33   | 9.68    | 16.25   | 32.680  | 19.7700000      | 19.770        |
| 5                                                                                | 18.00   | 51.2000    | 25.89   | 15.25   |         | 25.310  |                 |               |
| 6                                                                                | 13.89   | 31.4300    | 33.00   |         |         | 33.148  |                 |               |
| 7                                                                                | 18.90   | 21.2077    | 37.27   |         |         |         |                 |               |
