# Supplementary material for: Nutraceutical COMP-4 confers protection against endothelial dysfunction through the eNOS/iNOS-NO-cGMP pathway
Source: PubMed Central journal article supplement (PMC11801596; doi:10.1371/journal.pone.0316798), 2025-02-06
Supplement: pone.0316798.s007.pdf [file pone.0316798.s007.pdf]

|  | Group A | Group B | Group C  | Group D    |
|----------------------------------------------------------------------------------|---------|---------|----------|------------|
|                                                                                  | Control | LPS     | NO DONOR | COMP-4     |
|                                                                                  |         |         |          |            |
| 1                                                                                | 36.00   | 64.000  | 65.00    | 55.0000000 |
| 2                                                                                | 41.50   | 47.388  | 68.00    | 52.0000000 |
| 3                                                                                | 47.00   | 67.000  | 68.50    | 51.0000000 |
| 4                                                                                | 42.28   | 79.000  | 41.41    | 67.5800000 |
| 5                                                                                | 30.97   | 69.000  |          | 67.0000000 |
