# Supplementary material for: Nutraceutical COMP-4 confers protection against endothelial dysfunction through the eNOS/iNOS-NO-cGMP pathway
Source: PubMed Central journal article supplement (PMC11801596; doi:10.1371/journal.pone.0316798), 2025-02-06
Supplement: pone.0316798.s008.pdf [file pone.0316798.s008.pdf]

|  | Group A  | Group B  | Group C    | Group D  |
|----------------------------------------------------------------------------------|----------|----------|------------|----------|
|                                                                                  | Control  | IBMX     | SiLDENAFIL | COMP-4   |
|                                                                                  |          |          |            |          |
| 1                                                                                | 116.0203 | 121.0734 | 128.01     | 329.9807 |
| 2                                                                                | 109.9807 | 110.0000 | 130.00     | 359.0000 |
| 3                                                                                | 93.0000  | 78.3000  | 109.00     | 330.0000 |
| 4                                                                                |          |          |            | 440.0000 |
