# Supplementary material for: Nutraceutical COMP-4 confers protection against endothelial dysfunction through the eNOS/iNOS-NO-cGMP pathway
Source: PubMed Central journal article supplement (PMC11801596; doi:10.1371/journal.pone.0316798), 2025-02-06
Supplement: pone.0316798.s009.pdf [file pone.0316798.s009.pdf]

| Table format:<br>Grouped |         | Group A<br>nNOS |       |       |       |       |
|--------------------------|---------|-----------------|-------|-------|-------|-------|
|                          |         | A:Y1            | A:Y2  | A:Y3  | A:Y4  | A:Y5  |
| 1                        | Control | 1.000           | 1.000 | 1.000 | 1.000 | 1.000 |
| 2                        | COMP-4  | 1.112           | 0.229 | 1.264 | 0.229 | 1.621 |

| Ta |      | Group B<br>eNOS |       |       |       |       |
|----|------|-----------------|-------|-------|-------|-------|
|    | A:Y6 | B:Y1            | B:Y2  | B:Y3  | B:Y4  | B:Y5  |
| 1  |      | 1.000           | 1.000 | 1.000 | 1.000 | 1.000 |
| 2  |      | 4.530           | 3.191 | 5.542 | 4.187 | 7.389 |

| Ta |       | Group C<br>iNOS |       |       |       |       |
|----|-------|-----------------|-------|-------|-------|-------|
|    | B:Y6  | C:Y1            | C:Y2  | C:Y3  | C:Y4  | C:Y5  |
| 1  | 1.000 | 1.000           | 1.000 | 1.000 | 1.000 | 1.000 |
| 2  |       | 4.543           | 1.366 | 5.542 | 4.187 | 3.670 |

| Ta |  | C:Y6 |
|----|--|------|
| 1  |  |      |
| 2  |  |      |
