# Supplementary material for: Nutraceutical COMP-4 confers protection against endothelial dysfunction through the eNOS/iNOS-NO-cGMP pathway
Source: PubMed Central journal article supplement (PMC11801596; doi:10.1371/journal.pone.0316798), 2025-02-06
Supplement: pone.0316798.s010.pdf [file pone.0316798.s010.pdf]

| Table format:<br>Grouped |         | Group A |      |      |      | Group B |      |      |      | Group C |      |
|--------------------------|---------|---------|------|------|------|---------|------|------|------|---------|------|
|                          |         | nNOS    |      |      |      | eNOS    |      |      |      | iNOS    |      |
|                          |         | A:Y1    | A:Y2 | A:Y3 | A:Y4 | B:Y1    | B:Y2 | B:Y3 | B:Y4 | C:Y1    | C:Y2 |
| 1                        | CONTROL | 1.00    | 1.00 | 1.00 |      | 1.00    | 1.00 | 1.00 |      | 1.00    | 1.00 |
| 2                        | COMP-4  | 0.36    | 0.36 | 0.26 |      | 6.40    | 6.80 | 3.46 |      | 2.09    | 2.28 |

| Tap C |      |      |
|-------|------|------|
|       | C:Y3 | C:Y4 |
| 1     | 1.00 |      |
| 2     | 3.20 |      |
