# Supplementary material for: Nutraceutical COMP-4 confers protection against endothelial dysfunction through the eNOS/iNOS-NO-cGMP pathway
Source: PubMed Central journal article supplement (PMC11801596; doi:10.1371/journal.pone.0316798), 2025-02-06
Supplement: pone.0316798.s011.pdf [file pone.0316798.s011.pdf]

| Table format:<br>Column |       | Group A | Group B  | Group C |
|-------------------------|-------|---------|----------|---------|
|                         |       | Control | NO donor | COMP-4  |
|                         | ✕     |         |          |         |
| 1                       | Title | 116.0   | 40       | 65.90   |
| 2                       | Title | 127.5   | 51       | 27.50   |
| 3                       | Title | 130.0   | 57       | 57.12   |
