# Supplementary material for: Nutraceutical COMP-4 confers protection against endothelial dysfunction through the eNOS/iNOS-NO-cGMP pathway
Source: PubMed Central journal article supplement (PMC11801596; doi:10.1371/journal.pone.0316798), 2025-02-06
Supplement: pone.0316798.s012.pdf [file pone.0316798.s012.pdf]

|  | Group A | Group B  | Group C |
|----------------------------------------------------------------------------------|---------|----------|---------|
|                                                                                  | Control | NO donor | COMP-4  |
|                                                                                  |         |          |         |
| 1                                                                                | 95.00   | 65.00    | 72.00   |
| 2                                                                                | 80.93   | 52.66    | 49.23   |
| 3                                                                                | 90.50   | 56.00    | 72.42   |
| 4                                                                                | 90.00   | 72.41    | 50.28   |
