# Supplementary material for: Nutraceutical COMP-4 confers protection against endothelial dysfunction through the eNOS/iNOS-NO-cGMP pathway
Source: PubMed Central journal article supplement (PMC11801596; doi:10.1371/journal.pone.0316798), 2025-02-06
Supplement: pone.0316798.s013.pdf [file pone.0316798.s013.pdf]

|  | Group A  | Group B  | Group C  | Group D     |
|----------------------------------------------------------------------------------|----------|----------|----------|-------------|
|                                                                                  | Control  | COMP-4   | H2O2     | H2O2+COMP-4 |
| 1                                                                                | 190.0000 | 480.0000 | 110.0000 | 690.0000    |
| 2                                                                                | 216.0203 | 329.9807 | 178.0000 | 480.0000    |
| 3                                                                                | 238.0000 | 500.0000 | 140.0000 | 580.0000    |
| 4                                                                                | 250.9584 | 400.5284 | 205.1643 | 398.8145    |
| 5                                                                                |          |          |          | 539.5578    |
