# Supplementary material for: Nutraceutical COMP-4 confers protection against endothelial dysfunction through the eNOS/iNOS-NO-cGMP pathway
Source: PubMed Central journal article supplement (PMC11801596; doi:10.1371/journal.pone.0316798), 2025-02-06
Supplement: pone.0316798.s015.pdf [file pone.0316798.s015.pdf]

|  | Group A | Group B | Group C | Group D     |
|----------------------------------------------------------------------------------|---------|---------|---------|-------------|
|                                                                                  | CONTROL | COMP-4  | H2O2    | H2O2+COMP-4 |
| 1                                                                                | 71.73   | 57.56   | 78.43   | 41.15       |
| 2                                                                                | 75.18   | 57.51   | 70.63   | 36.12       |
