# Supplementary material for: Nutraceutical COMP-4 confers protection against endothelial dysfunction through the eNOS/iNOS-NO-cGMP pathway
Source: PubMed Central journal article supplement (PMC11801596; doi:10.1371/journal.pone.0316798), 2025-02-06
Supplement: pone.0316798.s016.pdf [file pone.0316798.s016.pdf]

|  | Group A | Group B | Group C | Group D     |
|----------------------------------------------------------------------------------|---------|---------|---------|-------------|
|                                                                                  | CONTROL | COMP-4  | H2O2    | H2O2+COMP-4 |
| 1                                                                                | 164.88  | 131.22  | 141.40  | 65.79       |
| 2                                                                                | 158.78  | 123.04  | 132.83  | 72.98       |
