# Supplementary material for: Nutraceutical COMP-4 confers protection against endothelial dysfunction through the eNOS/iNOS-NO-cGMP pathway
Source: PubMed Central journal article supplement (PMC11801596; doi:10.1371/journal.pone.0316798), 2025-02-06
Supplement: pone.0316798.s017.pdf [file pone.0316798.s017.pdf]

|  | Group A | Group B | Group C | Group D     |
|----------------------------------------------------------------------------------|---------|---------|---------|-------------|
|                                                                                  | CONTROL | COMP-4  | H2O2    | H2O2+COMP-4 |
| 1                                                                                | 44.268  | 46.094  | 48.079  | 33.065      |
| 2                                                                                | 48.079  | 43.123  | 50.558  | 31.282      |
