# Supplementary material for: Nutraceutical COMP-4 confers protection against endothelial dysfunction through the eNOS/iNOS-NO-cGMP pathway
Source: PubMed Central journal article supplement (PMC11801596; doi:10.1371/journal.pone.0316798), 2025-02-06
Supplement: pone.0316798.s019.pdf [file pone.0316798.s019.pdf]

|  | Group A | Group B | Group C | Group D     |
|----------------------------------------------------------------------------------|---------|---------|---------|-------------|
|                                                                                  | Control | COMP-4  | H2O2    | H2O2+COMP-4 |
|                                                                                  |         |         |         |             |
| 1                                                                                | 16.21   | 10.99   | 20.44   | 6.63        |
| 2                                                                                | 16.54   | 11.41   | 16.65   | 11.70       |
| 3                                                                                | 13.21   | 11.24   | 17.81   | 12.92       |
| 4                                                                                | 18.04   | 10.59   | 14.28   | 13.08       |
| 5                                                                                |         | 12.34   | 17.23   |             |
| 6                                                                                |         |         | 24.56   |             |
