# Supplementary material for: Nutraceutical COMP-4 confers protection against endothelial dysfunction through the eNOS/iNOS-NO-cGMP pathway
Source: PubMed Central journal article supplement (PMC11801596; doi:10.1371/journal.pone.0316798), 2025-02-06
Supplement: pone.0316798.s020.pdf [file pone.0316798.s020.pdf]

|  | Group A | Group B | Group C | Group D     |
|----------------------------------------------------------------------------------|---------|---------|---------|-------------|
|                                                                                  | CONTROL | COMP-4  | H2O2    | H2O2+COMP-4 |
| 1                                                                                | 34.000  | 22.400  | 38.367  | 17.200      |
| 2                                                                                | 29.735  | 21.926  | 38.000  | 17.000      |
| 3                                                                                | 31.000  | 26.835  | 40.350  | 17.100      |
| 4                                                                                | 40.000  | 23.800  | 51.000  | 18.800      |
| 5                                                                                |         | 20.000  |         |             |
